# Supplementary material
Source: PubMed Central journal article supplement (PMC3253554)
Supplement: NIHMS280549-supplement-supplement_1.pdf [file NIHMS280549-supplement-supplement_1.pdf]

## Supplementary material

### Isolation of Liver Mononuclear Cells (LMNC) and flow cytometry analysis

Animals received anesthesia with ketamine (100 mg/kg) and xylazine (10 mg/kg); the livers were perfused with Hank's balanced saline solution (HBSS) followed by *in vivo* digestion with 0.33 mg/ml Liberase RI Enzyme (*F. Hoffmann-La Roche Ltd; Basel Switzerland*) in HBSS. The liver mononuclear cells (LMNCs) were purified from whole liver cell suspension obtained after tissue disruption using centrifugation at slow speed (500g) and subsequent isolation in Percoll 40/70 gradient density at 800g; LMNC were harvested from the gradient interface. The cells were further washed in saline supplemented with 2% fetal bovine serum (FBS) and stained for surface NK cell marker NK1.1 (*BD Bioscience, San Jose, CA*). The cells were gated by size and granularity and their fluorescence was analyzed using the LSR flow cytometer.
